# Supplementary material for: Exploring YAP1-centered networks linking dysfunctional CFTR to epithelial–mesenchymal transition
Source: Life Sci Alliance. 2022 May 2;5(9):e202101326. doi: 10.26508/lsa.202101326 (PMC9060002; doi:10.26508/lsa.202101326)
Supplement: Supplementary file 2 [file LSA-2021-01326_Supplemental_Data_2.xlsx]

## Sheet: dataset_s2
CFBE wt-CFTR		CFBE F508del-CFTR
Gene	Uniprot	Gene	Uniprot
YWHAZ	P63104	YWHAQ	P27348
NT5E	P21589	YWHAZ	P63104
GOT2	P00505	NT5E	P21589
ABCD3	P28288	ABCD3	P28288
ACTB	P60709	ABLIM1	O14639
ACTG1	P63261	ABLIM3	O94929
ACTN1	P12814	ACTG1	P63261
ACTN4	O43707	ACTN1	P12814
SLC25A5	P05141	ACTN4	O43707
SLC25A6	P12236	SLC25A5	P05141
ALB	P02768	AFDN	P55196
ANXA2	P07355	ALB	P02768
ACTR2	P61160	ANXA2	P07355
ACTR3	P61158	ARPC1A	Q92747
ARPC5L	Q9BPX5	ARPC1B	O15143
ARPC2	O15144	ACTR2	P61160
ARPC3	O15145	ACTR3	P61158
ARPC4	P59998	ARPC5L	Q9BPX5
ARPC5	O15511	ARPC2	O15144
ATAD3A	Q9NVI7	ARPC3	O15145
ATAD3B	Q5T9A4	ARPC4	P59998
ATP5F1A	P25705	ARPC5	O15511
ATP5F1B	P06576	ATAD3A	Q9NVI7
TGFBI	Q15582	ATP5F1A	P25705
HSPA5	P11021	ATP5F1B	P06576
BTN1A1	Q13410	TGFBI	Q15582
CALD1	Q05682	HSPA5	P11021
CALM3	P0DP25	CALD1	Q05682
CAPRIN1	Q14444	CALML5	Q9NZT1
CAPZB	P47756	CALM3	P0DP25
CAPZA1	P52907	CAPRIN1	Q14444
CCN1	O00622	CAPZB	P47756
HSPD1	P10809	CAV1	Q03135
CGN	Q9P2M7	CAPZA1	P52907
CLTC	Q00610	CAPZA2	P47755
CFL1	P23528	CCN1	O00622
CORO1C	Q9ULV4	CD59	P13987
CPNE1	Q99829	HSPD1	P10809
SPECC1L	Q69YQ0	CGN	Q9P2M7
SPECC1	Q5M775	CLTC	Q00610
DCD	P81605	CFL1	P23528
DDX17	Q92841	CFL2	Q9Y281
DDX3X	O00571	CORO1B	Q9BR76
DDX5	P17844	CORO1C	Q9ULV4
DSP	P15924	CTNNA1	P35221
DSTN	P60981	CTNND1	O60716
DHX9	Q08211	SPECC1L	Q69YQ0
DLD	P09622	SPECC1	Q5M775
DBN1	Q16643	DCD	P81605
DSG2	Q14126	DDX17	Q92841
HADHA	P40939	DDX3X	O00571
#N/A	Q5VTE0	DDX5	P17844
EEF1G	P26641	DDX6	P26196
TUFM	P49411	DSP	P15924
ELAVL1	Q15717	DSTN	P60981
EMD	P50402	HSD17B4	P51659
ENO1	P06733	DHCR7	Q9UBM7
HSP90B1	P14625	DHX15	O43143
EWSR1	Q01844	DHX9	Q08211
EZR	P15311	DLD	P09622
FN1	P02751	DOCK7	Q96N67
FLNA	P21333	DBN1	Q16643
FLOT1	O75955	DSC1	Q08554
FUS	P35637	DSG2	Q14126
FXR1	P51114	EIF2AK2	P19525
GAPDH	P04406	HADHA	P40939
SHMT2	P34897	#N/A	Q5VTE0
GNAI2	P04899	EEF1D	P29692
GNAS	Q5JWF2	EEF1G	P26641
HSPA9	P38646	EFHD2	Q96C19
GSTP1	P09211	TUFM	P49411
SLC2A1	P11166	EMD	P50402
H1-2	P16403	ENO1	P06733
H2AJ	Q9BTM1	HSP90B1	P14625
H2BC13	Q99880	EWSR1	Q01844
H3C13	Q71DI3	EZR	P15311
H4C9	P62805	FBXO22	Q8NEZ5
HNRNPH1	P31943	FLG	P20930
HNRNPH3	P31942	FN1	P02751
HNRNPC	P07910	FLII	Q13045
HNRNPF	P52597	FLNA	P21333
HNRNPK	P61978	FLNB	O75369
HNRNPM	P52272	FLNC	Q14315
SYNCRIP	O60506	FLOT1	O75955
HNRNPU	Q00839	FLOT2	Q14254
HSPA1B	P0DMV9	FUS	P35637
HSP90AA1	P07900	FXR1	P51114
HSPA8	P11142	G3BP1	Q13283
IGF2BP1	Q9NZI8	GAPDH	P04406
IGF2BP2	Q9Y6M1	GAS2L3	Q86XJ1
IGF2BP3	O00425	GNB2	P62879
EIF4A1	P60842	GSN	P06396
KRT10	P13645	GNAI2	P04899
KRT14	P02533	GNAI3	P08754
KRT16	P08779	GNAS	Q5JWF2
KRT17	Q04695	HSPA9	P38646
KRT18	P05783	GSTP1	P09211
KRT19	P08727	COLGALT1	Q8NBJ5
KRT9	P35527	GTF2I	P78347
KRT2	P35908	SLC2A1	P11166
KRT1	P04264	H1-2	P16403
KRT5	P13647	H1-5	P16401
KRT6B	P04259	H2AJ	Q9BTM1
KRT6C	P48668	H2BC13	Q99880
KRT7	P08729	H3C13	Q71DI3
KRT8	P05787	H4C9	P62805
PKM	P14618	HNRNPH1	P31943
LAMA3	Q16787	HNRNPC	P07910
LAMB3	Q13751	HNRNPF	P52597
LAMC2	Q13753	HNRNPK	P61978
TMPO	P42166	HNRNPM	P52272
LGALS3BP	Q08380	SYNCRIP	O60506
LIMA1	Q9UHB6	HNRNPU	Q00839
LIMCH1	Q9UPQ0	HSPA1B	P0DMV9
LMNA	P02545	HSP90AB1	P08238
LMNB1	P20700	HSPA8	P11142
LMO7	Q8WWI1	HSPB1	P04792
IMMT	Q16891	EIF2S1	P05198
MYL12A	P19105	IGF2BP3	O00425
MPRIP	Q6WCQ1	EIF4A2	Q14240
MYADM	Q96S97	EIF6	P56537
MYH10	P35580	IGHG4	P01861
MYH14	Q7Z406	ILF2	Q12905
MYH9	P35579	ISOC1	Q96CN7
MYL6	P60660	ITPRID2	P28290
MYL9	P24844	ITPR3	Q14573
MYO1B	O43795	KIAA1671	Q9BY89
MYO1C	O00159	KRT10	P13645
MYO1D	O94832	KRT14	P02533
MYO6	Q9UM54	KRT16	P08779
PPP1R12A	O14974	KRT17	Q04695
NCL	P19338	KRT18	P05783
NUFIP2	Q7Z417	KRT19	P08727
PABPC1	P11940	KRT9	P35527
PABPC4	Q13310	KRT2	P35908
PARP1	P09874	KRT1	P04264
PAWR	Q96IZ0	KRT5	P13647
PDIA6	Q15084	KRT6A	P02538
PDLIM7	Q9NR12	KRT6B	P04259
PGAM5	Q96HS1	KRT6C	P48668
PKP3	Q9Y446	KRT7	P08729
JUP	P14923	KRT8	P05787
AGPAT1	Q99943	CKMT1B	P12532
POTEF	A5A3E0	KIF23	Q02241
PPP1CB	P62140	KLHDC10	Q6PID8
ALPG	P10696	PKM	P14618
PPIA	P62937	LACTB	P83111
PRDX1	Q06830	LAMA3	Q16787
PTBP1	P26599	LAMA5	O15230
PUF60	Q9UHX1	LAMB3	Q13751
RACK1	P63244	LAMC2	Q13753
RAI14	Q9P0K7	TMPO	P42166
RBM14	Q96PK6	TMPO	P42167
RBM39	Q14498	#N/A	Q5VSP4
TAF15	Q92804	LUC7L2	Q9Y383
RACGAP1	Q9H0H5	LDHA	P00338
RPL10A	P62906	LGALS1	P09382
RPL11	P62913	LGALS7B	P47929
RPL12	P30050	LGALS8	O00214
RPL13	P26373	LEMD2	Q8NC56
RPL13A	P40429	LGALS3BP	Q08380
RPL14	P50914	LIMA1	Q9UHB6
RPL15	P61313	LIMCH1	Q9UPQ0
RPL17	P18621	LMNA	P02545
RPL18	Q07020	LMNB1	P20700
RPL18A	Q02543	LMO7	Q8WWI1
RPL19	P84098	LRRFIP2	Q9Y608
RPL22	P35268	LSM14A	Q8ND56
RPL23A	P62750	MARCKS	P29966
RPL24	P83731	MEST	Q5EB52
RPL27A	P46776	IMMT	Q16891
RPL30	P62888	MISP	Q8IVT2
RPL35	P42766	MYL12A	P19105
RPL4	P36578	SLC25A3	Q00325
UBA52	P62987	MYO18A	Q92614
RPL6	Q02878	MYADM	Q96S97
RPL7	P18124	MYH10	P35580
RPL7A	P62424	MYH14	Q7Z406
RPL8	P62917	MYH9	P35579
RPL9	P32969	MYL6	P60660
RPLP0	P05388	MYL9	P24844
RPLP1	P05386	MYO1B	O43795
HNRNPA1	P09651	MYO1C	O00159
HNRNPA2B1	P22626	MYO1D	O94832
RRBP1	Q9P2E9	MYO5A	Q9Y4I1
RPS10	P46783	MYO5C	Q9NQX4
RPS13	P62277	MYO6	Q9UM54
RPS14	P62263	PPP1R12A	O14974
RPS16	P62249	NPM1	P06748
RPS18	P62269	NCL	P19338
RPS2	P15880	NUFIP2	Q7Z417
RPS20	P60866	OGDH	Q02218
RPS23	P62266	DLST	P36957
RPS25	P62851	TP53	P04637
RPS26	P62854	PABPC1	P11940
RPS3	P23396	SERPINE1	P05121
RPS3A	P61247	SERBP1	Q8NC51
RPS4X	P62701	PARP1	P09874
RPS5	P46782	PAWR	Q96IZ0
RPS6	P62753	PCBP2	Q15366
RPS8	P62241	PDIA3	P30101
RPS9	P46781	PDIA6	Q15084
RPSA	P08865	PDLIM7	Q9NR12
SERPINH1	P50454	PHB	P35232
SFPQ	P23246	PHB2	Q99623
CTTN	Q14247	PHLDB2	Q86SQ0
SRSF1	Q07955	PKP2	Q99959
SRSF3	P84103	PKP3	Q9Y446
SSBP1	Q04837	JUP	P14923
SVIL	O95425	AGPAT1	Q99943
TUBA1B	P68363	POTEF	A5A3E0
TUBA4A	P68366	POTEI	P0CG38
TUBB4B	P68371	PPP1CB	P62140
TUBB	P07437	ALPP	P05187
CCT2	P78371	PPIA	P62937
CCT4	P50991	PPIB	P23284
CCT3	P49368	PPP1R18	Q6NYC8
CCT8	P50990	PRDX1	Q06830
TNC	P24821	PFN2	P35080
VCP	P55072	PTBP1	P26599
TGM2	P21980	PUF60	Q9UHX1
THY1	P04216	RACK1	P63244
TMOD3	Q9NYL9	RAI14	Q9P0K7
TPM1	P09493	GPRC5A	Q8NFJ5
TPM3	P06753	RBM14	Q96PK6
TPM4	P67936	RBM39	Q14498
THBS1	P07996	TAF15	Q92804
TTBK1	Q5TCY1	UPF1	Q92900
TWF1	Q12792	RFC2	P35250
VTN	P04004	RACGAP1	Q9H0H5
YBX1	P67809	RPL11	P62913
ZNF185	O15231	RPL12	P30050
TJP1	Q07157	RPL13	P26373
TJP2	Q9UDY2	RPL13A	P40429
		RPL14	P50914
		RPL15	P61313
		RPL17	P18621
		RPL18	Q07020
		RPL18A	Q02543
		RPL19	P84098
		RPL22	P35268
		RPL23	P62829
		RPL23A	P62750
		RPL24	P83731
		RPL27	P61353
		RPL27A	P46776
		RPL29	P47914
		RPL3	P39023
		RPL30	P62888
		RPL32	P62910
		RPL35	P42766
		RPL36	Q9Y3U8
		RPL4	P36578
		UBA52	P62987
		RPL5	P46777
		RPL6	Q02878
		RPL7	P18124
		RPL7A	P62424
		RPL8	P62917
		RPL9	P32969
		RPLP0	P05388
		RPLP1	P05386
		RPLP2	P05387
		RBMXL1	Q96E39
		HNRNPA1	P09651
		HNRNPA2B1	P22626
		HNRNPA3	P51991
		RRBP1	Q9P2E9
		RPS10	P46783
		RPS11	P62280
		RPS13	P62277
		RPS14	P62263
		RPS16	P62249
		RPS18	P62269
		RPS2	P15880
		RPS20	P60866
		RPS23	P62266
		RPS25	P62851
		RPS26	P62854
		RPS3	P23396
		FAU	P62861
		RPS3A	P61247
		RPS4X	P62701
		RPS5	P46782
		RPS6	P62753
		RPS7	P62081
		RPS8	P62241
		RPS9	P46781
		RPSA	P08865
		RUNX1	Q01196
		RUVBL1	Q9Y265
		S100A8	P05109
		S100A9	P06702
		AHCY	P23526
		SEPTIN2	Q15019
		SEPTIN7	Q16181
		SEPTIN9	Q9UHD8
		SERPINH1	P50454
		SFPQ	P23246
		SIPA1L3	O60292
		SMTN	P53814
		SNTB2	Q13425
		SERPINB12	Q96P63
		SPTBN1	Q01082
		SPTAN1	Q13813
		CTTN	Q14247
		SRP14	P37108
		SRSF1	Q07955
		SRSF3	P84103
		SRSF5	Q13243
		SRSF6	Q13247
		SRSF7	Q16629
		SSBP1	Q04837
		STAU1	O95793
		SVIL	O95425
		TUBA1B	P68363
		TUBA1C	Q9BQE3
		TUBA4A	P68366
		TUBB4B	P68371
		TUBB	P07437
		TCP1	P17987
		CCT4	P50991
		CCT3	P49368
		CCT8	P50990
		CCT6A	P40227
		TECR	Q9NZ01
		TNC	P24821
		VCP	P55072
		TGM2	P21980
		#N/A	Q86V81
		THY1	P04216
		TINAGL1	Q9GZM7
		TMEM33	P57088
		TMOD3	Q9NYL9
		TPI1	P60174
		TPM1	P09493
		TPM2	P07951
		TPM3	P06753
		TPM4	P67936
		MELTF	P08582
		THBS1	P07996
		TWF1	Q12792
		USP10	Q14694
		VIM	P08670
		VTN	P04004
		XDH	P47989
		XRCC5	P13010
		YBX1	P67809
		ZC3HAV1	Q7Z2W4
		ZNF185	O15231
		TJP1	Q07157
		TJP2	Q9UDY2
