# Supplementary material for: Exploring YAP1-centered networks linking dysfunctional CFTR to epithelial–mesenchymal transition
Source: Life Sci Alliance. 2022 May 2;5(9):e202101326. doi: 10.26508/lsa.202101326 (PMC9060002; doi:10.26508/lsa.202101326)
Supplement: Supplementary file 4 [file LSA-2021-01326_Supplemental_Data_4.xlsx]

## Sheet: dataset_s4
Hallmark gene sets
Gene set name	Gene sets	F508del-CFTR FDR log10	wt-CFTR FDR log10	Description	Relevance to PPI network	YAP1 interactors that define the gene set
HALLMARK_MYC_TARGETS_V1	MYC targets	-40.0177	-29.4437	A subgroup of genes regulated by MYC	EMT related	LDHA, EIF2S1, NPM1, PHB2, SLC25A3, YWHAQ, DHX15, HNRNPA3, SERBP1, HSP90AB1, ILF2, SRSF7, TCP1
HALLMARK_EPITHELIAL_MESENCHYMAL_TRANSITION	Epithelial-mesenchymal transition	-19.4815	-12.0888	Genes defining epithelial-mesenchymal transition, as in wound healing, fibrosis and metastasis	EMT related	TPM2, SERPINE1, CD59, MEST, LGALS1, PFN2, PPIB, VIM, COLGALT1
HALLMARK_APICAL_JUNCTION	Apical junction	-13.6716	-13.0177	Genes encoding components of apical junction complex
HALLMARK_MTORC1_SIGNALING	mTORC1 signaling	-12.6696	-12.0888	Genes up-regulated through activation of mTORC1 complex
HALLMARK_MITOTIC_SPINDLE	Mitotic spindle	-11.7033	-5.61083	Genes important for mitotic spindle assembly	EMT related	MARCKS, KIF23, GSN, SPTAN1, FLNB, SPTBN1, SEPTIN9, STAU1
HALLMARK_G2M_CHECKPOINT	G2/M checkpoint	-8.61083	-6.53018	Genes involved in the G2/M checkpoint, as in progression through the cell division cycle
HALLMARK_HYPOXIA	Hypoxia	-6.74232	-4.84164	Genes up-regulated in response to low oxygen levels (hypoxia)	CF pathogenesis related	LDHA, SERPINE1, TPI1, CAV1
HALLMARK_UNFOLDED_PROTEIN_RESPONSE	Unfolded protein response	-6.43533	-5.6073	Genes up-regulated during unfolded protein response, a cellular stress response related to the endoplasmic reticulum
HALLMARK_MYOGENESIS	Myogenesis	-5.97881	-1.74958	Genes involved in development of skeletal muscle (myogenesis)
HALLMARK_OXIDATIVE_PHOSPHORYLATION	Oxidative phosphorylation	-5.97881	-4.84164	Genes encoding proteins involved in oxidative phosphorylation
HALLMARK_ESTROGEN_RESPONSE_EARLY	Estrogen response (early)	-4.34199	-3.1261	Genes defining early response to estrogen
HALLMARK_GLYCOLYSIS	Glycolysis	-4.34199	-3.95861	Genes encoding proteins involved in glycolysis and gluconeogenesis
HALLMARK_PI3K_AKT_MTOR_SIGNALING	PI3K/AKT/MTOR signaling	-3.83863	-4.84164	Genes up-regulated by activation of the PI3K/AKT/mTOR pathway
HALLMARK_COMPLEMENT	Complement	-3.64397	0	Genes encoding components of the complement system, which is part of the innate immune system
HALLMARK_E2F_TARGETS	E2F targets	-3.64397	-2.38195	Genes encoding cell cycle related targets of E2F transcription factors
HALLMARK_ANDROGEN_RESPONSE	Androgen response	-3.12033	-2.02872	Genes defining response to androgens
HALLMARK_PEROXISOME	Peroxisome	-3.05404	-1.99568	Genes encoding components of peroxisome
HALLMARK_ESTROGEN_RESPONSE_LATE	Estrogen response (late)	-2.97469	0	Genes defining late response to estrogen
HALLMARK_TGF_BETA_SIGNALING	TGFβ signaling	-2.48545	0	Genes up-regulated in response to TGFB1	EMT/CF pathogenesis related	SERPINE1, SPTBN1
HALLMARK_UV_RESPONSE_DN	UV response (DN)	-2.38405	0	Genes down-regulated in response to ultraviolet (UV) radiation
HALLMARK_P53_PATHWAY	P53 pathway	-2.73049	-1.74958	Genes involved in p53 pathways and networks
HALLMARK_ALLOGRAFT_REJECTION	Allograft rejection	-2.37469	-2.38195	Genes up-regulated during transplant rejection
HALLMARK_HEDGEHOG_SIGNALING	Hedgehog signaling	0	-1.33348	Genes up-regulated by activation of hedgehog signaling
HALLMARK_PROTEIN_SECRETION	Protein secretion	0	-1.33348	Genes involved in protein secretion pathway
