# Supplementary material for: Exploring YAP1-centered networks linking dysfunctional CFTR to epithelial–mesenchymal transition
Source: Life Sci Alliance. 2022 May 2;5(9):e202101326. doi: 10.26508/lsa.202101326 (PMC9060002; doi:10.26508/lsa.202101326)
Supplement: Supplementary file 7 [file LSA-2021-01326_TableS2.xlsx]

## Sheet: table_s2
Target	Fw/Rv primer	Sequence (5’-3’)
CEBPB	Fw+Rv	QT00237580 (Qiagen)
GAPDH	Fw	ATGGGGAAGGTGAAGGTCG
	Rv	GGGGTCATTGATGGCAACAATA
TEAD4	Fw	GAACGGGGACCCTCCAATG
	Rv	GCGAGCATACTCTGTCTCAAC
TWIST1	Fw	GTCCGCAGTCTTACGAGGAG
	Rv	GCTTGAGGGTCTGAATCTTGCT
YAP1	Fw	TAGCCCTGCGTAGCCAGTTA
	Rv	TCATGCTTAGTCCACTGTCTGT
